# Supplementary material
Source: publisher site journal article supplement (https://www.dovepress.com/article/508864)
Supplement: Supplementary file 1 [file get_supplementary_file.php]

# Evaluation of Anti-inflammatory and Antibacterial Properties of Photo-thermal Hydrogel as Dual Functional Platform for management of Periodontitis

Zhisong Mai1, Yuying Mai1, Xianxian Huang1, Shipeng Ning3, Hongbing Liao2

1 Department of Prosthodontics, School of Stomatology, Guangxi Medical University, Nanning, Guangxi, 530021, China

2 Guangxi Key Laboratory of Oral and Maxillofacial Rehabilitation and Reconstruction, College of Stomatology, Guangxi Medical University, No.10 Shuangyong Road Nanning, Guangxi 530021, China

3 Research Center of Nanomedicine Technology, the Second Affiliated Hospital of Guangxi Medical University, Nanning, 530000, China

Correspondence: Hongbing Liao ([hongbing_liao@gxmu.edu.cn](mailto:hongbing_liao@gxmu.edu.cn))

**Experimental Section**

1. **Cell cytotoxicity assessment**

Murine macrophage cell line RAW 264.7 was purchased from Procell (China). Cells were cultured in DMEM supplemented with 10% FBS in 95% humidified environment with 5% CO2. RAW 264.7 cells were seeded in 96-well plates at a density of 2×103 cells/well. After 24 h, medium was replaced by DMEM containing different concentrations of PtCuSe. Then 10 μL of CCK-8 was added in each well after 24 h, 48 h and 72 h respectively, followed by OD values measurement at 450 nm using a Microplate reader.

1. **Statistical analysis**

All data were represented as Mean ± SD. The GraphPad Prism 8 was employed for data analysis. Data were analyzed using the t-test and one-way analysis of variance (ANOVA). All experiments were performed in at least three replicates. A p-value of < 0.05 was considered statistically significant (*p < 0.05, **p < 0.01, ***p < 0.001).

**Supporting figures**


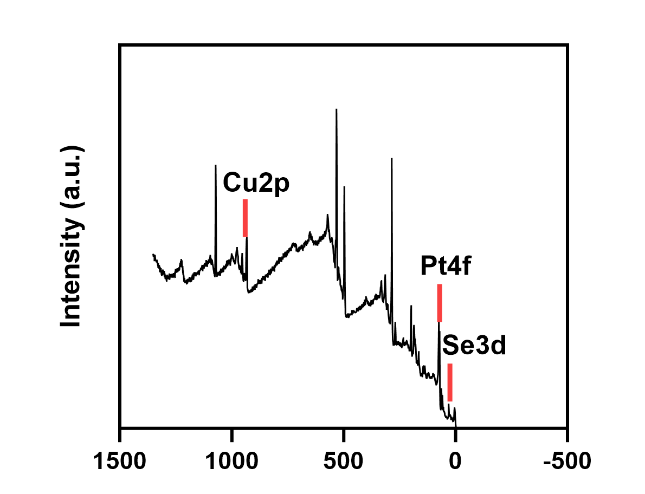


Figure S1. XPS spectrum of PtCuSe nanozyme.


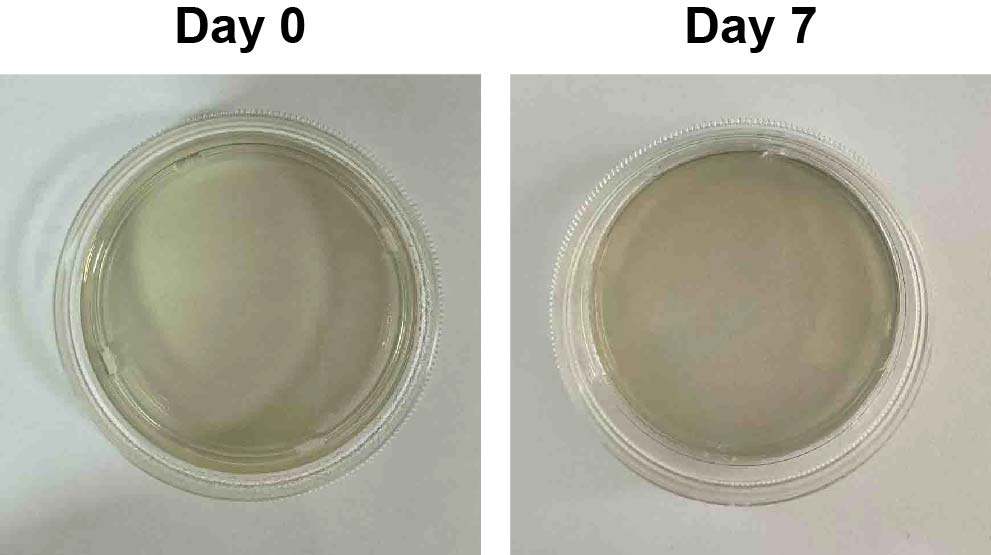


Figure S2. Images of PtCuSe hydrogel on day 0 and day 7.


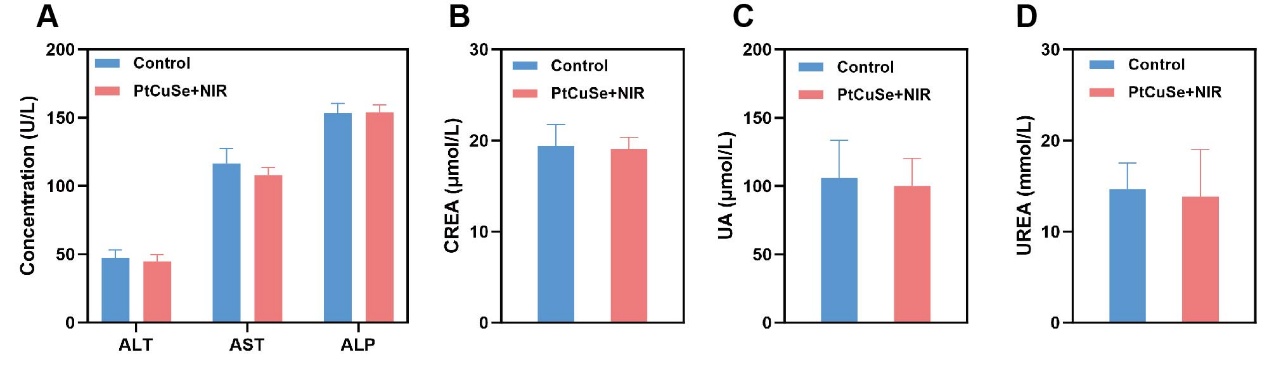


Figure S3. Biosafety analysis. (A) Liver function. (B)-(D) Kidney function.
